# Supplementary material for: Lattice distortion derived catalytic degradation in multi-oxide cathode catalyst for Li–oxygen batteries
Source: Royal Society of Chemistry journal article supplement (doi:10.1039/d2ta05411f), 2022-01-01
Supplement: d2ta05411f1.pdf [file d2ta05411f1.pdf]

Electronic Supplementary Material (ESI) for Journal of Materials Chemistry A. This journal is © The Royal Society of Chemistry 2022

Electronic Supplementary Information

## **Lattice distortion derived catalytic degradation in multi-oxide**

### **cathode catalyst for Li-oxygen batteries**

Ruwei Liu<sup>a</sup>, Yiming Fu<sup>b</sup>, Guoliang Zhang<sup>a</sup>, Liang Guo<sup>a</sup>, Ruonan Yang<sup>a</sup>, Xiuqi Zhang<sup>a</sup>, Qing Zhu<sup>\*c</sup> and Feng Dang<sup>\*a</sup>

---

<sup>a</sup> Key Laboratory for Liquid-Solid Structural Evolution and Processing of Materials (Ministry of Education), Shandong University, 17923 Jingshi Road, Jinan, 250061, Shandong Province, P.R.China. E-mail: dangfeng@sdu.edu.cn.

<sup>b</sup> School of Life Sciences, Qilu Normal University, Jinan, 250200, Shandong Province, P.R. China. E-mail: 20152789@qlnu.edu.cn

<sup>c</sup> Shandong Institute of Innovation and Development, Jinan, 250101, Shandong Province, P.R. China. E-mail: zhuqing0109@163.com.

*Chemical reagents:* All the chemical required for the synthesis, including Polyvinylpyrrolidone (PVP, Macklin, China), N, N-dimethylformamide solvent (DMF) (99.5%, Sinopharm, China), acetate (99.5%, Aladdin, China), 2-Methylimidazole (MeIM) (98%, Aladdin, China), methanol(99.5%, Sinopharm, China), Cobalt(II) acetate tetrahydrate( $\text{Co}(\text{NO}_3)_2 \cdot 6\text{H}_2\text{O}$ ), ammonium metatungstate hydrate( $(\text{NH}_4)_6\text{H}_2\text{W}_{12}\text{O}_{40} \cdot x\text{H}_2\text{O}$ , 99.95%, Aladdin, China) and deionized water were used as received without further purification.

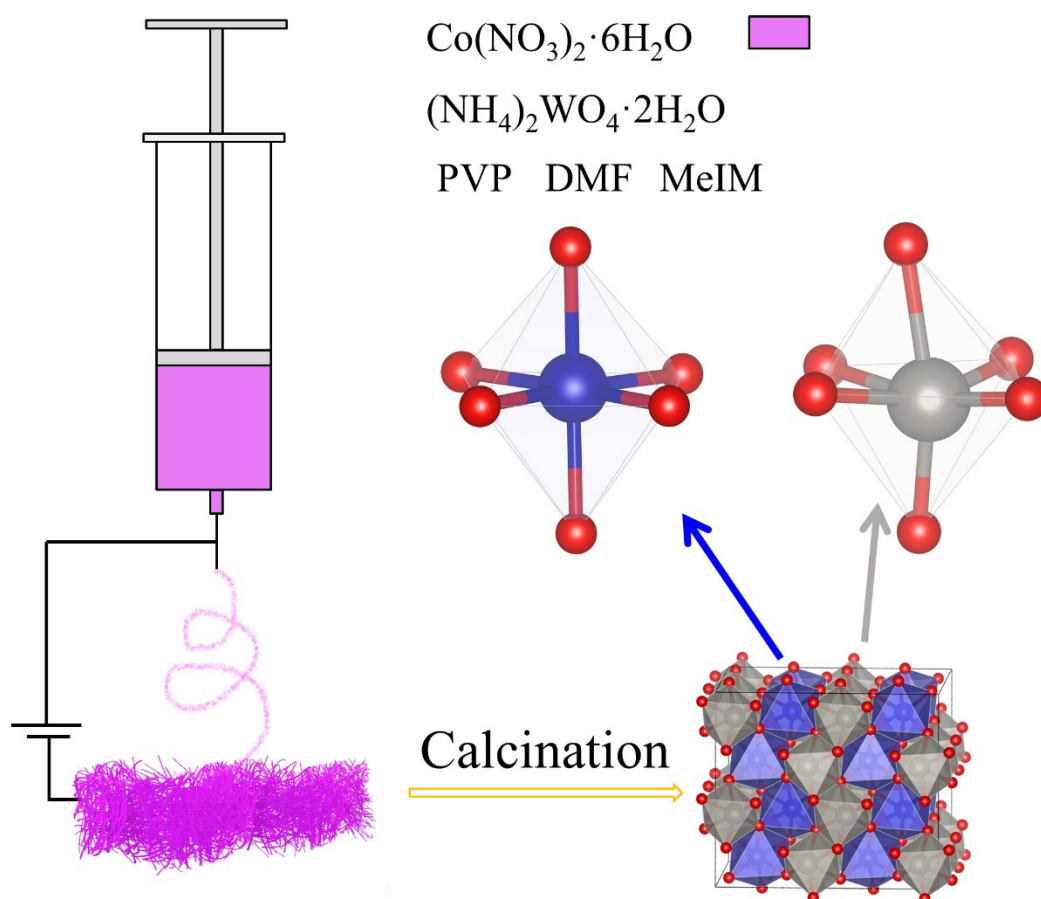

**Figure S1.** Schematic illustration of the preparation procedure of  $\text{CoWO}_4$  nanofibers.

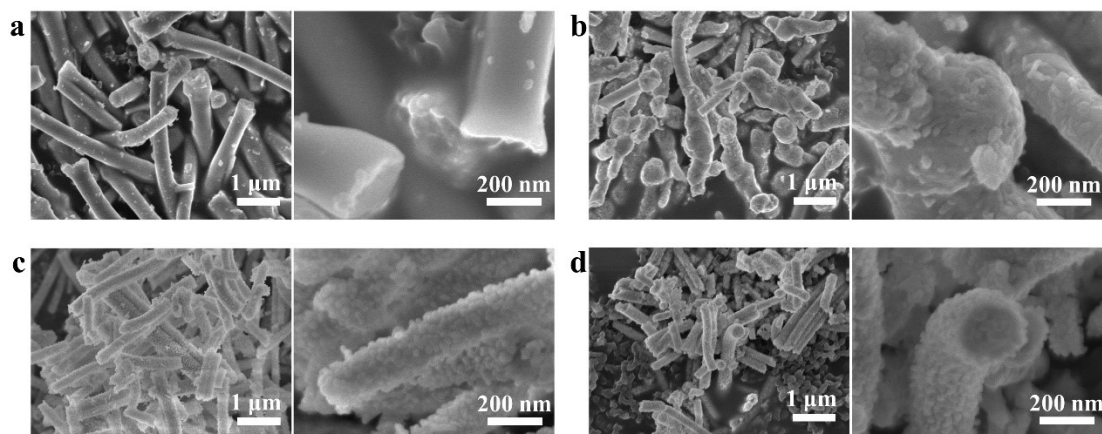

**Figure S2.** SEM images of a)  $\text{CoWO}_4$ , b)  $\text{CoWO}_5$ , c)  $\text{CoWO}_6$  and d)  $\text{CoWO}_7$ .



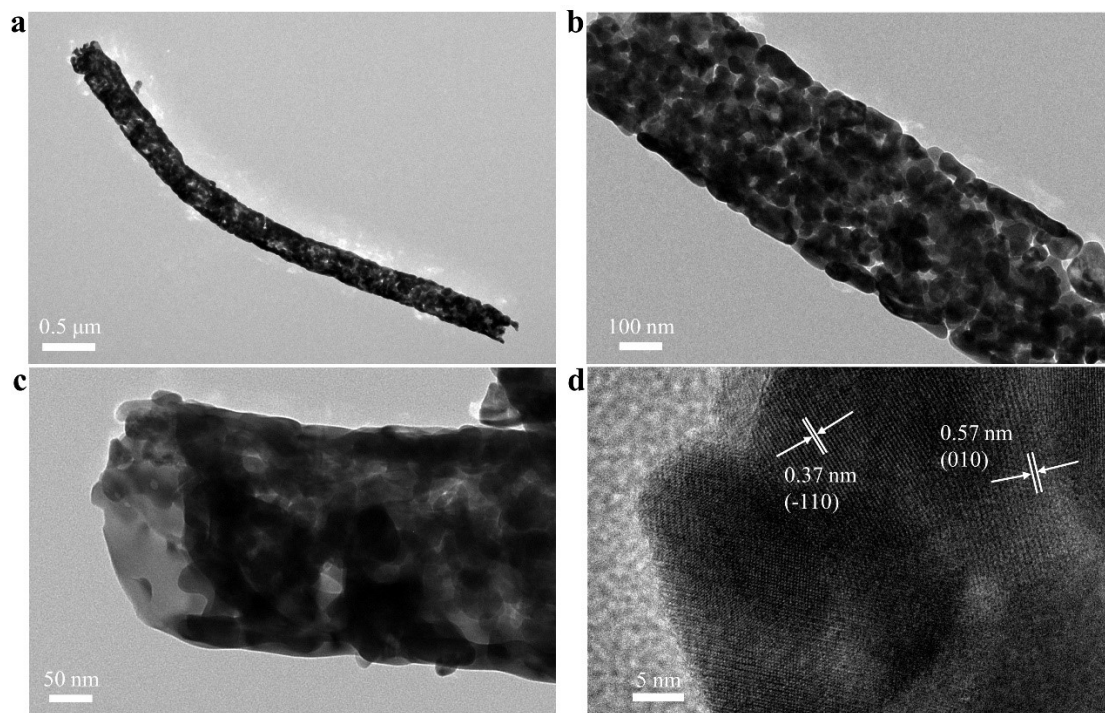

**Figure S3.** HRTEM images of CoWO-7.

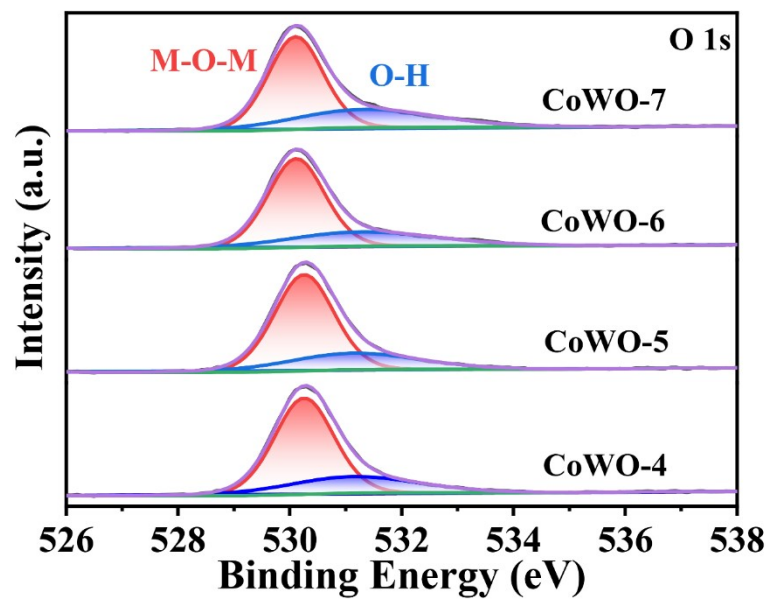

Figure S4. XPS spectra of O 1s.

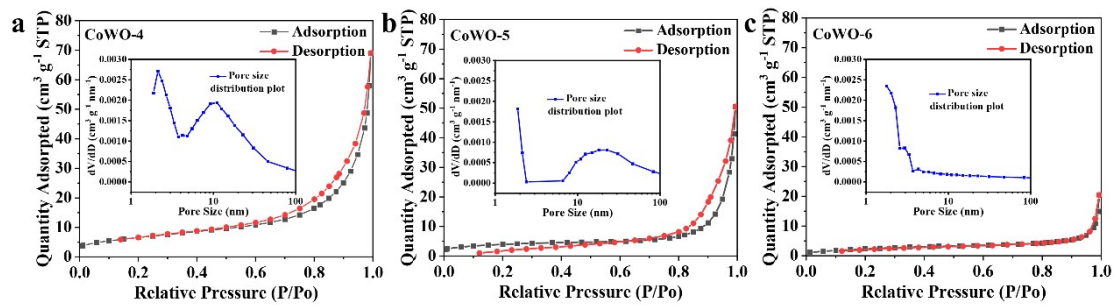

**Figure S5.** BET profiles of a) CoWO-4, b) CoWO-5 and c) CoWO-6.

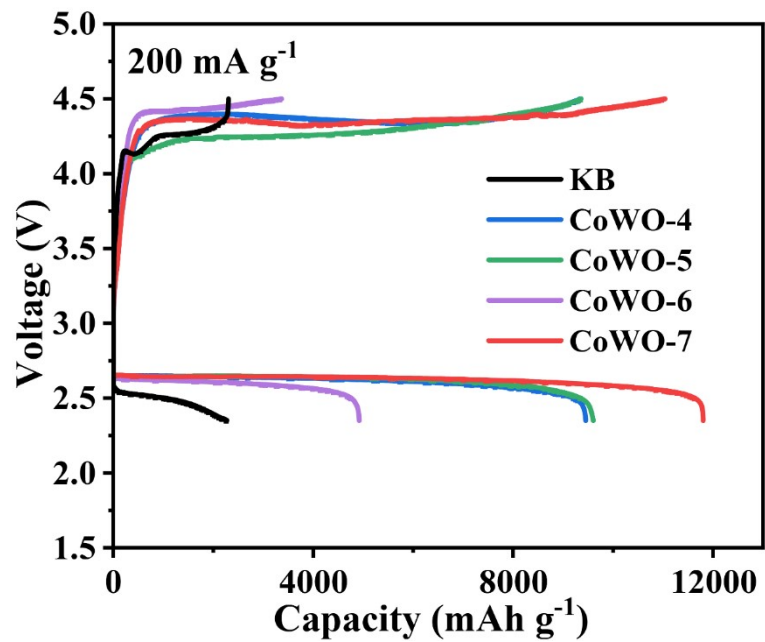

**Figure S6.** Specific capacity of Li-O<sub>2</sub> batteries with different electrodes at a current density of 200 mA g<sup>-1</sup>.

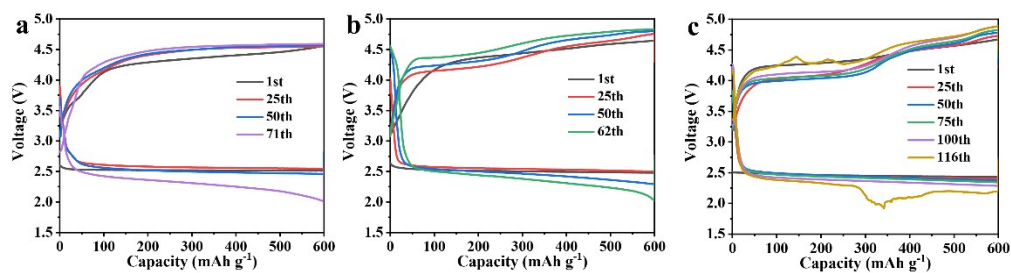

**Figure S7.** Selected discharge/charge curves with voltages of  $\text{CoWO}_4$  samples within an upper-limited specific capacity of  $600 \text{ mAh g}^{-1}$  at a current density of  $1000 \text{ mA g}^{-1}$ : a) CoWO-4, b) CoWO-5 and c) CoWO-6.



DFT calculation:

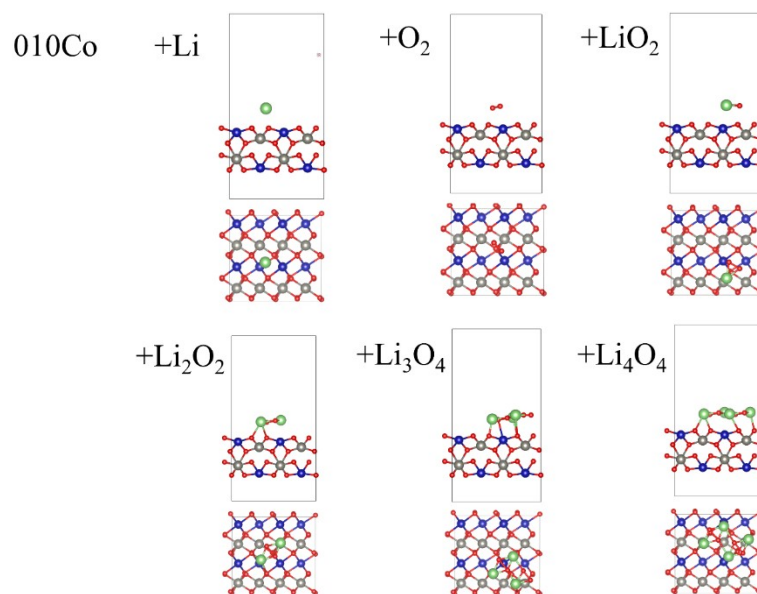

**Figure S8.** The most stable structure of different adsorbed species on 010Co surface.

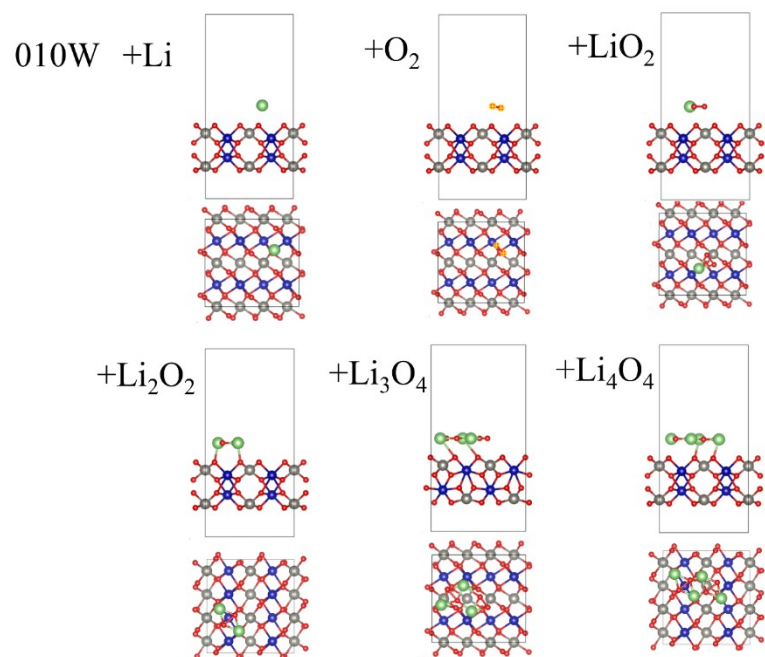

**Figure S9.** The most stable structure of different adsorbed species on 010W surface.

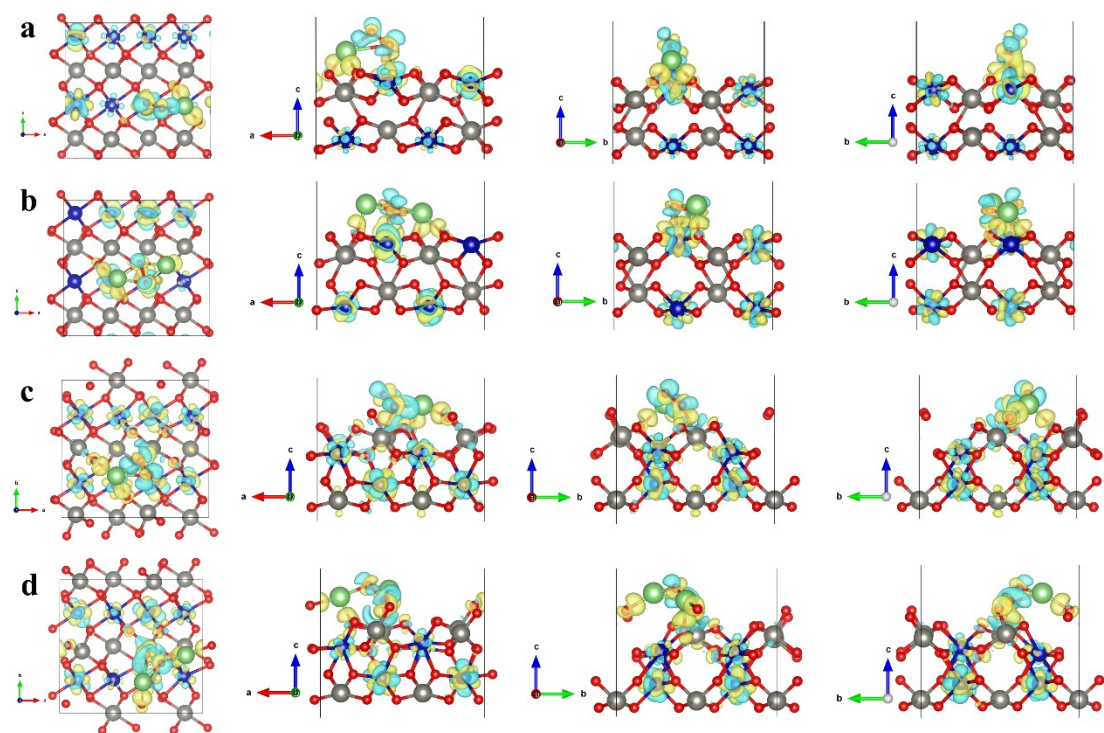

**Figure S10.** Charge density difference of  $\text{LiO}_2$  and  $\text{Li}_2\text{O}_2$  adsorbates on 010 surfaces from different directions. (a)  $010\text{Co} + \text{LiO}_2$ , (b)  $010\text{Co} + \text{Li}_2\text{O}_2$ , (c)  $010\text{W} + \text{LiO}_2$ , and (d)  $010\text{W} + \text{Li}_2\text{O}_2$ .

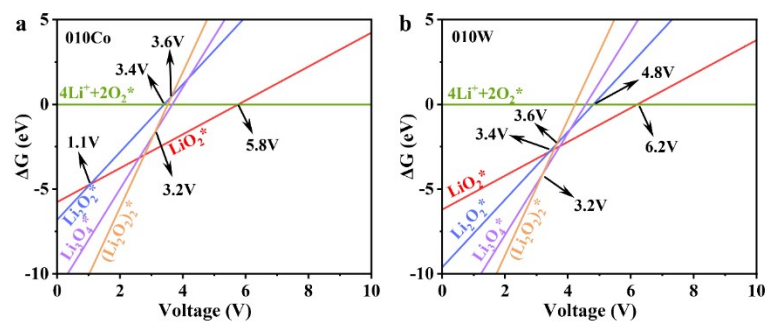

**Figure S11.** Phase diagrams of the cathode reaction on a) 010Co and b) 010W facets.

**Table S1.** Result of BET of CoWO<sub>4</sub> samples.

| <b>Sample</b> | <b>Surface area [m<sup>2</sup> g<sup>-1</sup>]</b> | <b>Pore volume [cm<sup>3</sup> g<sup>-1</sup>]</b> | <b>Pore size [nm]</b> |
|---------------|----------------------------------------------------|----------------------------------------------------|-----------------------|
| CoWO-4        | 23.8414                                            | 0.035916                                           | 37.8266               |
| CoWO-5        | 13.3943                                            | 0.078211                                           | 35.0059               |
| CoWO-6        | 8.8363                                             | 0.036583                                           | 33.4177               |
| CoWO-7        | 6.3868                                             | 0.017345                                           | 17.5010               |

**Table S2.** Comparison of surface energy of low-Miller-index facets.

| <b>Surface</b> | <b>Surface energy (J m<sup>-2</sup>)</b> |
|----------------|------------------------------------------|
| 001            | 0.9072                                   |
| 010            | 0.4925                                   |
| 010            | 1.3533                                   |
| 100            | 3.0056                                   |
| 011            | 2.1803                                   |
| 101            | 2.5211                                   |
| 110            | 1.331                                    |
| 111            | 2.4914                                   |
| 020            | 1.174                                    |
| 200            | 3.0049                                   |
| -111           | 3.4629                                   |

**Table S3.** The calculated adsorption energy ( $E_{\text{ads}}$ ) of different adsorbed species on different planes and corresponding Bader charge analysis result ( $\Delta Q$ ) and distance between the adsorbed species and surface of substrates.

| <b>010Co</b>                   | <b><math>E_{\text{ads}}(\text{eV})</math></b> | <b><math>\Delta Q(\text{surface})</math></b> | <b><math>\Delta Q(\text{adsorbate})</math></b> | <b><math>R(\text{\AA})</math></b> |
|--------------------------------|-----------------------------------------------|----------------------------------------------|------------------------------------------------|-----------------------------------|
| Li                             | -0.87528                                      | 0.90332                                      | -0.90905                                       | 1.49520                           |
| O <sub>2</sub>                 | 0.03874                                       | -0.00440                                     | 0.00440                                        | 3.17919                           |
| LiO <sub>2</sub>               | -3.06703                                      | 0.24940                                      | -0.24940                                       | 1.81641                           |
| Li <sub>2</sub> O <sub>2</sub> | -2.64276                                      | 0.45639                                      | -0.45639                                       | 1.63198                           |
| Li <sub>3</sub> O <sub>4</sub> | -2.35432                                      | 0.41179                                      | -0.41179                                       | 2.16879                           |
| Li <sub>4</sub> O <sub>4</sub> | -3.77246                                      | 0.63593                                      | -0.63593                                       | 1.91556                           |
| <b>010W</b>                    | <b><math>E_{\text{ads}}(\text{eV})</math></b> | <b><math>\Delta Q(\text{surface})</math></b> | <b><math>\Delta Q(\text{adsorbate})</math></b> | <b><math>R(\text{\AA})</math></b> |
| Li                             | -5.91735                                      | 0.91576                                      | -0.91577                                       | 0.76442                           |
| O <sub>2</sub>                 | -2.03282                                      | -0.00328                                     | 0.00327                                        | 2.86156                           |
| LiO <sub>2</sub>               | -3.50619                                      | 0.28006                                      | -0.28007                                       | 1.26172                           |
| Li <sub>2</sub> O <sub>2</sub> | -5.44270                                      | 0.49621                                      | -0.49621                                       | 1.48843                           |
| Li <sub>3</sub> O <sub>4</sub> | -5.03443                                      | 0.62797                                      | -0.62797                                       | 1.42463                           |
| Li <sub>4</sub> O <sub>4</sub> | -6.57695                                      | 0.83627                                      | -0.83628                                       | 1.52208                           |
